# Supplementary material
Source: publisher figshare collection journal article supplement (https://acs.figshare.com/ndownloader/files/4535653)

## Supplemental data

SAD patterns of both undoped nanotube and Ni-doped nanotube

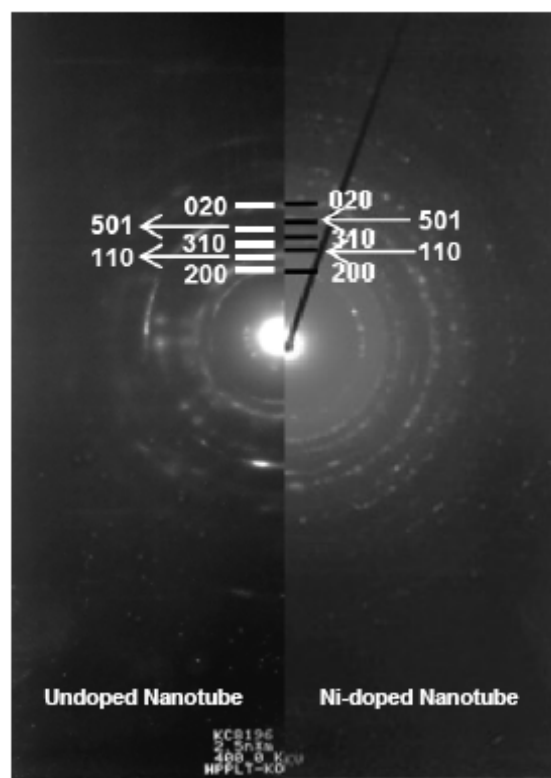

EDS spectrum of Ni doped nanotubes

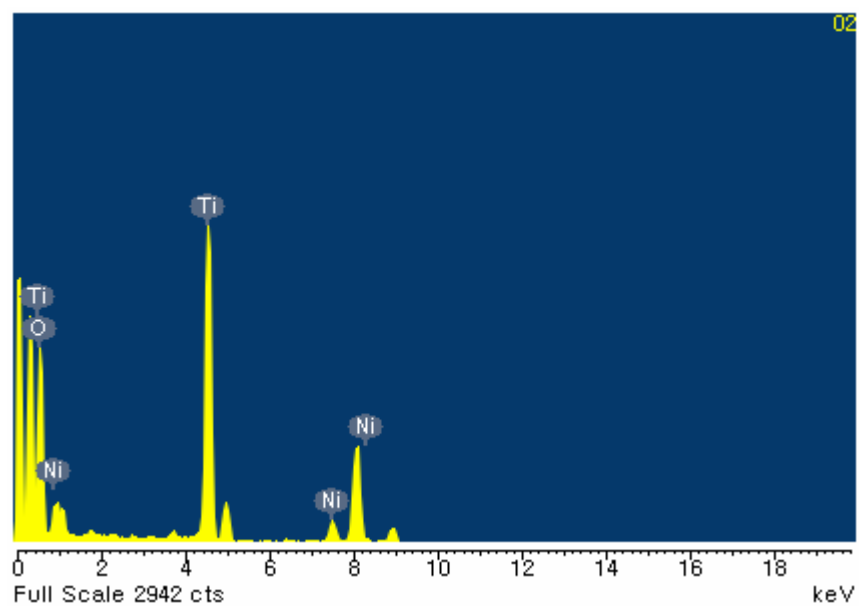

Simulated XRD pattern in Figure 2.

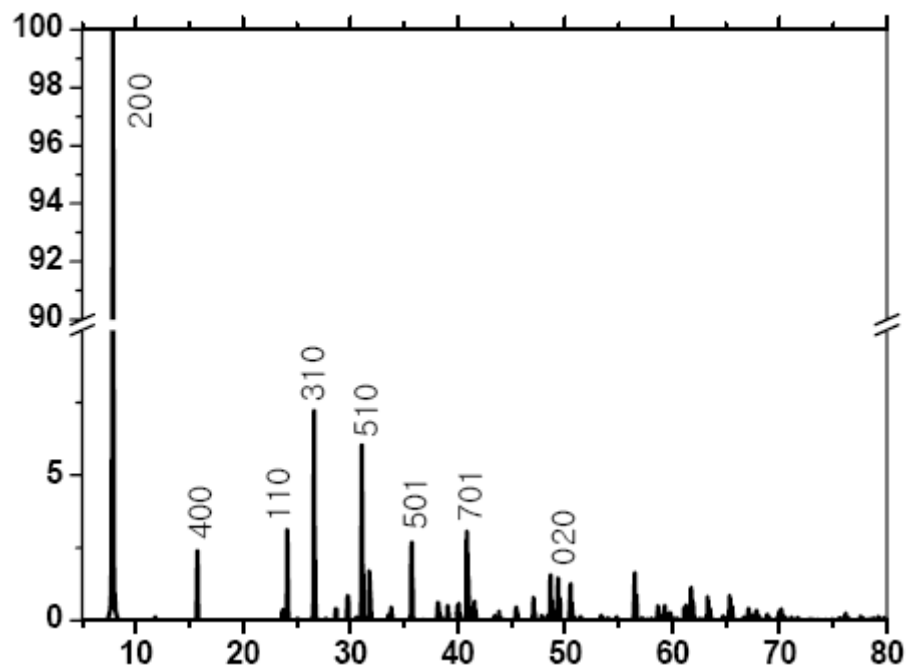

Supplement: Supplementary file 1 [file 4535653]
